# Supplementary material for: Selective Removal of Hexavalent Chromium by Novel Nitrogen and Sulfur Containing Cellulose Composite: Role of Counter Anions
Source: MDPI journal article supplement (doi:10.3390/ma16010184), 2022-12-25
Supplement: s1 [file s1]

Supporting information

# Selective Removal of Hexavalent Chromium by Novel Nitrogen and Sulfur Containing Cellulose Composite: Role of Counter Anions

Xiong Peng <sup>1,2</sup>, Shujun Liu <sup>2</sup>, Zhijia Luo <sup>1</sup>, Xiwen Yu <sup>3</sup> and Wanwen Liang <sup>1,\*</sup>

<sup>1</sup> School of Chemistry and Chemical Engineering, Guangzhou University, Guangzhou, 510006, China

<sup>2</sup> School of Chemistry and Chemical Engineering, South China University of Technology, Guangzhou 510640, China

<sup>3</sup> Institute of Biological and Medical Engineering, Guangdong Academy of Sciences, Guangzhou 510316, China

\* Correspondence: wanwen.liang@foxmail.com

The kinetic models were described by pseudo-first order kinetic model:

$$Q_t = Q_e(1 - e^{-k_1 t}) \quad (S1)$$

and the pseudo-second order kinetic model:

$$Q_t = \frac{k_2 Q_e^2 t}{1 + k_2 Q_e t} \quad (S2)$$

where  $Q_t$  (mg/g) denotes the removal capacity at time  $t$  (min);  $Q_e$  is the removal capacity at equilibrium;  $k_1$  and  $k_2$  represent the pseudo-first-order and pseudo-second-order rate constants, respectively.

The adsorption isothermal models were described by Langmuir and Freundlich isotherm model. The Langmuir isotherm model can be expressed as:

$$Q_e = \frac{K_L Q_{max}}{1 + K_L C_e} \quad (S3)$$

and the Freundlich isotherm model can be expressed as:

$$Q_e = K_f C_e^{\frac{1}{n}} \quad (S4)$$

where  $Q_e$  (mg/g), and  $C_e$  (mg/L) are the uptake capacity and the adsorption equilibrium concentration of organoarsenic compounds, separately.  $Q_{max}$  (mg/g) is theoretical maximum uptake capacity.  $K_L$  and  $K_f$  are Langmuir and Freundlich adsorption constant at equilibrium, respectively;  $n$  is used to describe adsorption intensity.

The Sips isotherm model is the combination of Langmuir and Freundlich models, and expressed as:

$$Q_e = \frac{K_s Q_{max} C_e^{\frac{1}{n}}}{1 + K_s C_e^{\frac{1}{n}}} \quad (S5)$$

where  $K_s$  is the Sips constant, which is related to the adsorption energy. The physical meanings of other parameters are the same as those of Langmuir and Freundlich models.

The thermal dynamic parameters,  $\Delta H$  (kJ/mol),  $\Delta G$  (kJ/mol), and  $\Delta S$  (kJ/mol) were calculated by the equations below:

$$\ln K_d^0 = \ln \frac{1000 Q_e}{C_e} = \frac{\Delta S}{R} - \frac{\Delta H}{RT} = - \frac{\Delta G}{RT} \quad (S6)$$

where  $K_d^0$  is the dimensionless distribution coefficient,  $Q_e$  (mg/g) and  $C_e$  (mg/L) are the same as mentioned above.

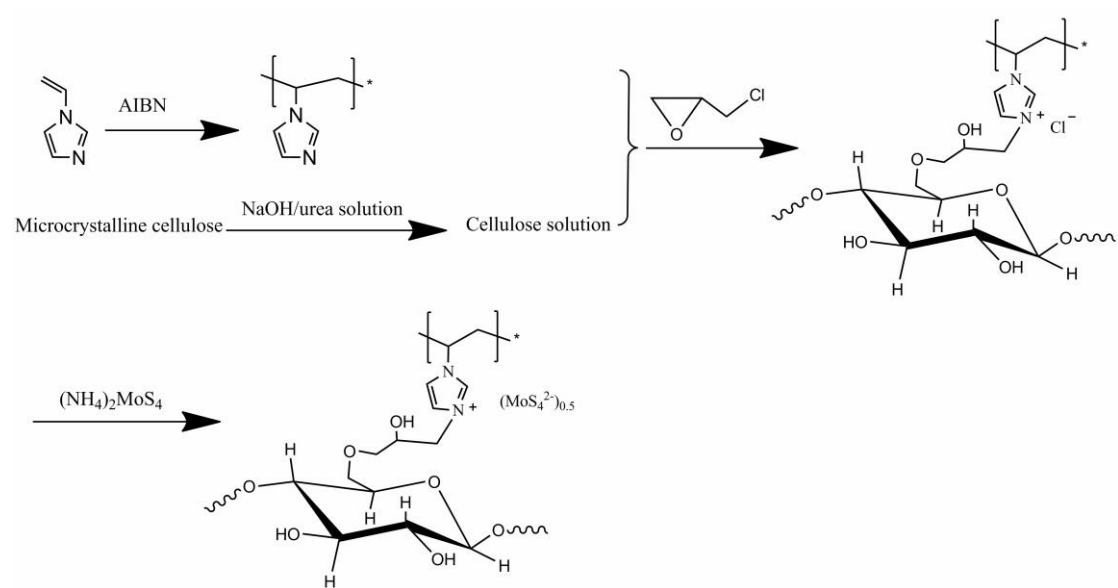

**Figure S1.** The synthesis routine of MPS composite.
